# Supplementary material
Source: PubMed Central journal article supplement (PMC2141842)

*slyB*

IPTG - + - +

A+G 1 2 3 4

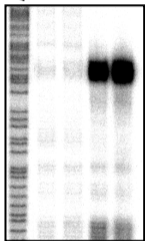

pQE80L

pQE-b1500

*yrbL*

IPTG - + - +

A+G 1 2 3 4

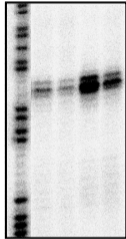

pQE80L

pQE-b1500

*hemL*

IPTG - + - +

A+G 1 2 3 4

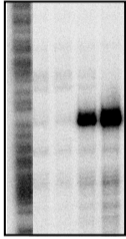

pQE80L

pQE-b1500

Supplement: pnas_0705768104_1.pdf [file pnas_0705768104_1.pdf]
